# Supplementary material for: Luminescent CaTiO3:Yb,Er nanofibers co-conjugated with Rose Bengal and gold nanorods for potential synergistic photodynamic/photothermal therapy
Source: Royal Society of Chemistry journal article supplement (doi:10.1039/c7tb01165b), 2017-01-01
Supplement: c7tb01165b1.pdf [file c7tb01165b1.pdf]

## **Luminescent CaTiO<sub>3</sub>:Yb,Er Nanofibers Co-conjugated with Rose Bengal and Gold Nanorods for Potential Synergistic Photodynamic/Photothermal Therapy**

**Yike Fu<sup>a†</sup>, Heng Liu<sup>a†</sup>, Zhaohui Ren<sup>a</sup>, Xiang Li<sup>a\*</sup>, Jie Huang<sup>b</sup>, Serena Best<sup>c</sup>, Gaorong Han<sup>a\*</sup>**

<sup>a</sup> *State Key Laboratory of Silicon Materials, School of Materials Science and Engineering, Zhejiang University, Hangzhou, Zhejiang 310027, P. R. China.*

<sup>b</sup> *Department of Mechanical Engineering, University College London, London WC1E 7JE, UK.*

<sup>c</sup> *Department of Materials Science and Metallurgy, University of Cambridge, Cambridge CB3 0FS, UK.*

\* *E-mail: xiang.li@zju.edu.cn; hgr@zju.edu.cn*

† *Authors contributed equally to this work.*

The UV-vis absorption spectra of RB-HA molecules with different concentrations were examined (Figure S1a). A linear fit was calculated between the concentration of RB-HA molecules and the absorption intensity (Figure S1b). The correlation equation is  $\text{Abs} = 96.0355 \times \text{concentration (mg/mL)} + 0.0010$  (correlation coefficient  $R^2 = 0.99$ ). Therefore, the concentration of RB-HA molecules loaded on CTO fibers could be obtained *via* substituting the difference between the absorption intensity at ~566 nm of pure CTO (0.08 mg/mL) and CTO-RB (0.08 mg/mL) into the correlation equation (Figure S1c). The number of RB-HA molecules attached is therefore determined to be  $1.77 \times 10^{16}$  molecules per milligram CTO nanofibers.

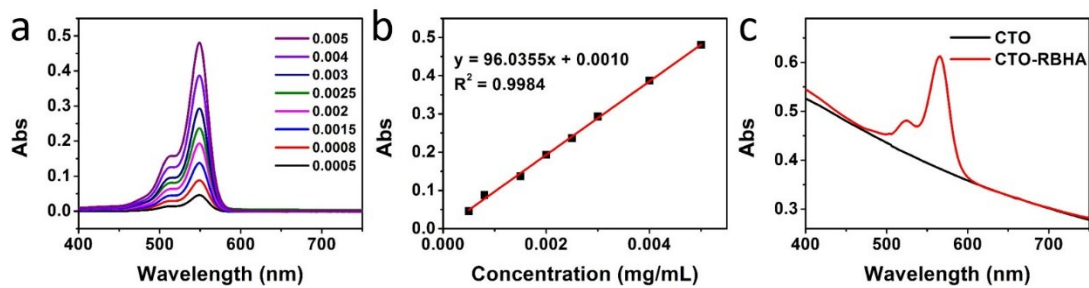

Figure S1 (a) UV-vis absorption spectra of RB-HA with different concentrations; (b) Linear correlation between the absorption intensity at 549 nm and the concentration of RB-HA; (c) UV-vis absorption spectra of CTO nanofibers and CTO-RBHA nanocomposite.
